# Supplementary material for: Impact of pre-operative antimicrobial treatment on microbiological findings from endocardial specimens in infective endocarditis
Source: Eur J Clin Microbiol Infect Dis. 2019 Jan 24;38(3):497–503. doi: 10.1007/s10096-018-03451-5 (PMC6394703; doi:10.1007/s10096-018-03451-5)
Supplement: Supplementary file 1 — (XLSX 9 kb) [file 10096_2018_3451_MOESM1_ESM.xlsx]

## Sheet: Taul1
Supplement table 1. PCR methods used.
Supplement table 1. PCR methods used.
Time period	Extraction method	Polymerase	PCR Instrument	Program
09/13/2016-	SelectNAplus (Molzym)	Moltaq (Molzym)	Simpliamp (Thermo Fisher Scientific)	95˚C 2 min, 40 cycles of 94˚C 15 s, 62˚C 20 s, 72˚C 45 s
10/26/2015-09/12/2016	SelectNA Blood Pathogen Kit plus Tissue Add-On (Molzym), Nordiag Arrow Instrument	Moltaq (Molzym)	Simpliamp (Thermo Fisher Scientific)	95˚C 2 min, 40 cycles of 94˚C 15 s, 62˚C 20 s, 72˚C 45 s
03/10/2015-10/25/2015	SelectNA Blood Pathogen Kit plus Tissue Add-On (Molzym), Nordiag Arrow Instrument	Moltaq (Molzym)	Tetrad 2 Peltier Thermal Cycler (Bio-Rad, Hercules, CA, US	95˚C 2 min, 40 cycles of 94˚C 15 s, 64˚C 15 s, 72˚C 30 s
11/10/2011-03/09/2015	Easymag (BioMérieux)	Moltaq (Molzym)	Tetrad 2 Peltier Thermal Cycler (Bio-Rad, Hercules, CA, US	95˚C 2 min, 40 cycles of 94˚C 15 s, 64˚C 15 s, 72˚C 30 s
02/18/2011-11/09/2011	Easymag (BioMérieux)	Amplitaq Gold (Thermo Fisher Scientific)	Tetrad 2 Peltier Thermal Cycler (Bio-Rad, Hercules, CA, US	95˚C 2 min, 40 cycles of 94˚C 15 s, 64˚C 15 s, 4. 72˚C 30 s
01/01/2011-02/16/2011	Easymag (BioMérieux)	Qiagen HotStar Taq (Qiagen)	Tetrad 2 Peltier Thermal Cycler (Bio-Rad, Hercules, CA, US	95˚C 15 min, 45 cycles of 94˚C 30 s, 3. 64˚C 60 s
